# Supplementary material
Source: PubMed Central journal article supplement (PMC3984301)
Supplement: cc-13-1030-s01.pdf [file cc-13-1030-s01.pdf]

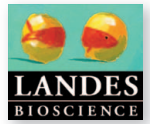

## **Supplemental Material to:**

**Minlee Kim, Xiaowei Chen, Lena J Chin, Trupti Paranjape,  
William C Speed, Kenneth K Kidd, Hongyu Zhao,  
Joanne B Weidhaas, Frank J Slack**

**Extensive sequence variation in the 3' untranslated region  
of the KRAS gene in lung and ovarian cancer cases**

**Cell Cycle 2014; 13(6)**

**<http://dx.doi.org/10.4161/cc.27941>**

**<http://www.landesbioscience.com/journals/cc/article/27941>**

| SNP ID                          | chr12 (hg19) | Ancestral allele | Derived allele | Putative miRNA binding sites | Disease                       | Association with the derived allele                                     | Reference                |
|---------------------------------|--------------|------------------|----------------|------------------------------|-------------------------------|-------------------------------------------------------------------------|--------------------------|
| rs12245 (previously rs10771184) | 25358650     | A                | T              | miR-544                      | Ovarian cancer                | Increased cancer risk, increased survival, favorable treatment outcome  | Liang et al., 2010       |
| rs13096                         | 25359841     | T                | C              | Not specified in the study   | Endometriosis                 | Not associated with risk                                                | Zhao et al., 2006        |
| rs61764370                      | 25360224     | A                | C              | <i>let-7</i> (LCS6)          | NSCLC                         | Increased risk                                                          | Chin et al., 2008        |
| rs61764370                      | 25360224     | A                | C              | <i>let-7</i> (LCS6)          | NSCLC                         | No association with risk and survival                                   | Nelson et al., 2010      |
| rs61764370                      | 25360224     | A                | C              | <i>let-7</i> (LCS6)          | EOC                           | Increased risk                                                          | Ratner et al., 2010      |
| rs61764370                      | 25360224     | A                | C              | <i>let-7</i> (LCS6)          | EOC                           | Not associated with risk                                                | Pharoah et al., 2011     |
| rs61764370                      | 25360224     | A                | C              | <i>let-7</i> (LCS6)          | Triple-negative breast cancer | Increased risk                                                          | Paranjape et al., 2011   |
| rs61764370                      | 25360224     | A                | C              | <i>let-7</i> (LCS6)          | Breast cancer                 | Not associated with risk                                                | Hollestelle et al., 2011 |
| rs61764370                      | 25360224     | A                | C              | <i>let-7</i> (LCS6)          | Breast cancer                 | HER2-overexpressed cases with hormone replacement therapy               | Cerne et al., 2012       |
| rs61764370                      | 25360224     | A                | C              | <i>let-7</i> (LCS6)          | Oral cancer                   | Reduced survival                                                        | Christensen et al., 2009 |
| rs61764370                      | 25360224     | A                | C              | <i>let-7</i> (LCS6)          | Colorectal cancer             | Better survival in early stages                                         | Smits et al., 2011       |
| rs61764370                      | 25360224     | A                | C              | <i>let-7</i> (LCS6)          | Colorectal cancer             | Reduced survival in late stages                                         | Ryan et al., 2012        |
| rs61764370                      | 25360224     | A                | C              | <i>let-7</i> (LCS6)          | Colorectal cancer             | Favorable cetuximab monotherapy in metastatic cases, increased survival | Zhang et al., 2011       |
| rs61764370                      | 25360224     | A                | C              | <i>let-7</i> (LCS6)          | Colorectal cancer             | Reduced survival in metastatic cases treated with cetuximab-irinotecan  | Graziano et al., 2010    |
| rs61764370                      | 25360224     | A                | C              | <i>let-7</i> (LCS6)          | Colorectal cancer             | Unfavorable response to anti-EGFR therapies in metastatic cases         | Sebio et al., 2013       |
| rs61764370                      | 25360224     | A                | C              | <i>let-7</i> (LCS6)          | Endometriosis                 | Increased risk                                                          | Grechukhina et al., 2012 |
| rs61764370                      | 25360225     | A                | C              | <i>let-7</i> (LCS6)          | Endometriosis                 | Not associated with risk                                                | Luong et al., 2012       |
| rs9266                          | 25362217     | A                | G              | Not specified in the study   | Endometriosis                 | Not associated with risk                                                | Zhao et al., 2006        |
| rs712                           | 25362552     | A                | C              | <i>let-7</i> (LCS1)          | Oral squamous cell carcinoma  | Decreased risk (with G/T and T/T)                                       | Wang et al., 2011        |
| rs712                           | 25362552     | A                | C              | <i>let-7</i> (LCS1)          | Gastric cancer                | Increased risk with T/T                                                 | Li et al., 2013          |
| rs712                           | 25362552     | A                | C              | <i>let-7</i> (LCS1)          | Colorectal cancer             | Increased risk with T/T                                                 | Pan et al., 2013         |

**Sup. Table 1. The reported diseases-associated SNPs in the 3' UTR of *KRAS*.** Five SNPs have been reported to be associated with diseases to date. NSCLC: non-small cell lung cancer. EOC: epithelial ovarian cancer. LCS: *let-7* complementary site.

|    | chr12<br>(hg19) | SNP ID      | Putative miRNA complementary sites                                                         | LCS      | Ago<br>binding |
|----|-----------------|-------------|--------------------------------------------------------------------------------------------|----------|----------------|
| 1  | 25362552        | rs712       | miR-422a, miR-330-5p, miR-3125, miR-877, miR-378bc, miR-1299, miR-193b, miR-200bc, miR-429 | ✓ (LCS1) | ✓              |
| 2  | 25362536        | rs150334904 | miR-330-5p, miR-326, miR-4314, miR-1299                                                    |          | ✓              |
| 3  | 25362465        | rs4285970   | 501-3p, miR-502-3p, miR-217, miR-4323                                                      |          |                |
| 4  | 25362422        | rs1141947   | miR-181abcd, miR-23ab, miR-377, miR-543, miR-4262                                          |          | ✓              |
| 5  | 25362325        | rs140080026 | miR-493                                                                                    |          | ✓              |
| 6  | 25362229        | rs61763588  | miR-181abcd, miR-425, miR-549                                                              |          | ✓              |
| 7  | 25362217        | rs9266      | miR-181abcd, miR-4262, miR-132                                                             |          | ✓              |
| 8  | 25362018        | rs188697761 | miR-346, miR-873                                                                           |          |                |
| 9  | 25361978        | rs184195260 | miR-4323, miR-2054                                                                         |          | ✓              |
| 10 | 25361905        | rs61763589  | miR-384, miR-202*, miR-590-3p, miR-580                                                     |          |                |
| 11 | 25361756        | rs61763590  | miR-133ab, miR-421                                                                         |          |                |
| 12 | 25361667        | rs61763591  | miR-200a, miR-141, miR-425, miR-3166                                                       |          |                |
| 13 | 25361646        | rs7960917   |                                                                                            |          |                |
| 14 | 25361589        | rs61764365  | miR-219-5p                                                                                 | ✓ (LCS9) |                |
| 15 | 25361472        | rs190606609 | miR-96, miR-182, miR-1271, miR-96, miR-431                                                 |          |                |
| 16 | 25361412        | rs186283516 | miR-146a, miR-146b-5p, miR-219-5p                                                          |          |                |
| 17 | 25361189        | rs61764366  |                                                                                            |          |                |
| 18 | 25361142        | rs7973450   | miR-143, miR-302c*                                                                         |          | ✓              |
| 19 | 25361091        | rs4597149   | miR-410, miR-340, miR-376c                                                                 |          | ✓              |
| 20 | 25361074        | rs7973623   | miR-501-5p                                                                                 |          | ✓              |
| 21 | 25360979        | rs113446944 | miR-412, miR-340, miR-410                                                                  |          |                |
| 22 | 25360964        | rs115968671 | miR-340, miR-410, miR-3167, miR-607                                                        |          |                |
| 23 | 25360580        | rs1141948   | miR-145*                                                                                   |          |                |
| 24 | 25360559        | rs61764367  | miR-145*                                                                                   |          |                |
| 25 | 25360545        | rs61764368  | miR-630, miR-665,                                                                          |          |                |
| 26 | 25360358        | rs61764369  |                                                                                            | ✓ (LCS4) |                |
| 27 | 25360342        | rs140231179 | miR-486-5p                                                                                 |          |                |
| 28 | 25360224        | rs61764370  | miR-18ab                                                                                   | ✓ (LCS6) |                |
| 29 | 25360138        | rs4963858   | miR-599, miR-148ab, miR-152, miR-199ab-5p                                                  |          |                |
| 30 | 25360098        | rs190084851 |                                                                                            |          |                |

|    |          |             |                                                                                                                     |          |   |
|----|----------|-------------|---------------------------------------------------------------------------------------------------------------------|----------|---|
| 31 | 25360091 | rs76218271  |                                                                                                                     |          |   |
| 32 | 25360082 | rs149693994 |                                                                                                                     |          |   |
| 33 | 25360078 | rs1141949   |                                                                                                                     |          |   |
| 34 | 25359927 | rs186623679 | miR-142-5p, miR-573, miR-526b*, miR-548k, miR-562, miR-20a, miR-93, miR-302c, miR-373, miR-520b, miR-520c-3p, miR-1 |          |   |
| 35 | 25359919 | rs180766260 | miR-142-5p, miR-573, miR-526b*, miR-548k, miR-20a, miR-93                                                           |          |   |
| 36 | 25359898 | rs191137453 | miR-26a,b                                                                                                           |          |   |
| 37 | 25359841 | rs13096     | miR-101, miR-144, miR-493*, let-7a-2*, let-7g*                                                                      |          | ✓ |
| 38 | 25359688 | rs187126935 |                                                                                                                     |          |   |
| 39 | 25359577 | rs61764371  | let-7 family, miR-202                                                                                               | ✓ (LCS7) | ✓ |
| 40 | 25359447 | rs182008815 |                                                                                                                     |          |   |
| 41 | 25359352 | rs1137188   | miR-129-5p, miR-876-5p, miR-421, miR-511, miR-513b, miR-624, miR-541*, miR-1290                                     |          |   |
| 42 | 25359328 | rs1137189   | miR-32*, miR-380                                                                                                    |          | ✓ |
| 43 | 25359227 | rs61764372  | miR-365, miR-3121                                                                                                   |          | ✓ |
| 44 | 25359217 | rs115375135 | miR-134, miR-3121                                                                                                   |          | ✓ |
| 45 | 25359178 | rs188922523 | miR-340, miR-132, miR-2052                                                                                          |          |   |
| 46 | 25358969 | rs1137196   | miR-129-5p                                                                                                          |          |   |
| 47 | 25358955 | rs184169974 | miR-129-5p, miR-2115*                                                                                               |          |   |
| 48 | 25358943 | rs8720      | miR-2115*                                                                                                           |          |   |
| 49 | 25358890 | rs181569153 | miR-410, miR-340                                                                                                    |          |   |
| 50 | 25358828 | rs12587     | miR-425                                                                                                             |          |   |
| 51 | 25358650 | rs12245     | miR-421, miR-143                                                                                                    |          |   |
| 52 | 25358486 | rs189426424 | miR-30a,bcde, miR-181abcd, miR-545*                                                                                 |          | ✓ |
| 53 | 25358475 | rs14172     | miR-181abcd, miR-4262, miR-132                                                                                      |          | ✓ |
| 54 | 25358418 | rs61764374  | miR-186                                                                                                             |          |   |
| 55 | 25358392 | rs192263744 | miR-153, miR-448, miR-217, miR-377, miR-570                                                                         |          |   |
| 56 | 25358371 | rs188034409 | miR-570, miR-3157, miR-3148                                                                                         |          |   |

**Sup. Table 2. All known SNPs in the 3' UTR of *KRAS* and putative miRNA complementary sites**

The 3' UTR of *KRAS* contains a total of 56 SNPs reported in dbSNP135. 17 SNPs reside within predicted high confidence miRNA complementary sites, which are putative miRNA complementary sites that are within Argonaute binding sites.

|    | chr12 (hg19) | Ancestral | Derived | SNP ID     | # of DNA sequenced | Freq | % Freq | Putative miRNA complementary sites                                                          | LCS | Ago binding |
|----|--------------|-----------|---------|------------|--------------------|------|--------|---------------------------------------------------------------------------------------------|-----|-------------|
| 1  | 25362573     | T         | G       | Novel 1    | 55                 | 4    | 7.3    | miR-20a*, miR-548X, miR-3148                                                                |     | ✓           |
| 2  | 25362552     | A         | C       | rs712      | 57                 | 43   | 75.4   | miR-422a,,miR-330-5p, miR-3125, miR-877, miR-378bc, miR-1299, miR-193b, miR-200b,c, miR-429 | ✓   | ✓           |
| 3  | 25362534     | C         | T       | Novel 2    | 55                 | 15   | 27.3   | miR-330-5p, miR-326, miR-548d-3p, miR-1299, miR-4314                                        |     | ✓           |
| 4  | 25362532     | C         | A       | Novel 3    | 55                 | 2    | 3.6    | miR-330-5p, miR-326, miR-548d-3, miR-449c*                                                  |     |             |
| 5  | 25362481     | C         | T       | Novel 4    | 56                 | 28   | 50.0   | none                                                                                        |     |             |
| 6  | 25362422     | A         | C       | rs1141947  | 56                 | 1    | 1.8    | miR-181a,b,c,d, miR-23a,b,miR-377, miR-543, miR-4262                                        |     | ✓           |
| 7  | 25362217     | A         | G       | rs9266     | 54                 | 37   | 68.5   | miR-181a,b,c,d, miR-4262, miR-132                                                           |     | ✓           |
| 8  | 25362033     | G         | C       | Novel 5    | 57                 | 5    | 8.8    | miR-873, miR-320abcd, miR-5481, miR-4294                                                    |     | ✓           |
| 9  | 25361966     | G         | C       | Novel 6    | 57                 | 4    | 7.0    | miR-380, miR-2054, miR-4323, miR-32*                                                        |     | ✓           |
| 10 | 25361950     | G         | C       | Novel 7    | 54                 | 10   | 18.5   | miR-340, miR-944, miR-126*, miR-4282, miR-32*                                               |     | ✓           |
| 11 | 25361932     | A         | T       | Novel 8    | 58                 | 3    | 5.2    | miR-335*, miR-944                                                                           |     | ✓           |
| 12 | 25361888     | A         | T       | Novel 9    | 55                 | 11   | 20.0   | miR-220c, miR-4270                                                                          |     | ✓           |
| 13 | 25361863     | G         | A       | Novel 10   | 58                 | 4    | 6.9    | miR-488, miR-561, miR-1276, miR-2278                                                        |     | ✓           |
| 14 | 25361771     | C         | G       | Novel 11   | 56                 | 6    | 10.7   | miR-193a-3p, miR-193b, miR-328                                                              |     |             |
| 15 | 25361756     | C         | A       | rs61763590 | 56                 | 4    | 7.1    | miR-133ab, miR-421                                                                          |     |             |
| 16 | 25361722     | A         | G       | Novel 12   | 56                 | 9    | 16.1   | miR-377, miR-320ab, miR-371-5p                                                              |     |             |
| 17 | 25361683     | A         | G       | Novel 13   | 55                 | 5    | 9.1    | miR-491-5p, miR-128                                                                         |     |             |
| 18 | 25361667     | C         | T       | rs61763591 | 54                 | 1    | 1.9    | miR-200a, miR-141, miR-425, miR-3166                                                        |     |             |
| 19 | 25361649     | A         | G       | Novel 14   | 54                 | 2    | 3.7    | miR-425, miR-3166                                                                           |     |             |
| 20 | 25361646     | T         | C       | rs7960917  | 54                 | 9    | 16.7   | none                                                                                        |     |             |
| 21 | 25361645     | A         | G       | Novel 15   | 54                 | 5    | 9.3    | none                                                                                        |     |             |
| 22 | 25361621     | G         | C       | Novel 16   | 50                 | 7    | 14.0   | miR-874                                                                                     |     |             |
| 23 | 25361142     | A         | G       | rs7973450  | 55                 | 11   | 20.0   | miR-143, miR-302c*                                                                          |     | ✓           |
| 24 | 25361091     | T         | C       | rs4597149  | 55                 | 50   | 90.9   | miR-410, miR-340, miR-376c                                                                  |     | ✓           |

|    |          |   |   |            |    |    |      |                                                                                 |   |   |
|----|----------|---|---|------------|----|----|------|---------------------------------------------------------------------------------|---|---|
| 25 | 25361074 | G | A | rs7973623  | 55 | 9  | 16.4 | miR-501-5p                                                                      |   | ✓ |
| 26 | 25360559 | G | C | rs61764367 | 61 | 9  | 14.8 | miR-145*                                                                        |   |   |
| 27 | 25360545 | T | C | rs61764368 | 61 | 1  | 1.6  | miR-630, miR-665,                                                               |   |   |
| 28 | 25360499 | G | A | Novel 17   | 61 | 38 | 62.3 | miR-335*, miR-25, miR-32, miR-92ab, miR-363, miR-367                            |   |   |
| 29 | 25360358 | G | A | rs61764369 | 61 | 1  | 1.6  | none                                                                            | ✓ |   |
| 30 | 25360224 | A | C | rs61764370 | 70 | 15 | 21.4 | miR-18ab                                                                        | ✓ |   |
| 31 | 25360138 | T | C | rs4963858  | 65 | 64 | 98.5 | miR-599, miR-148a,b, miR-152, miR-199a,b-5p                                     |   |   |
| 32 | 25359841 | T | C | rs13096    | 64 | 55 | 85.9 | miR-101, miR-144, miR-493*, let-7a-2*, let-7g*                                  |   | ✓ |
| 33 | 25359577 | C | T | rs61764371 | 60 | 2  | 3.3  | let-7 family, miR-202                                                           | ✓ | ✓ |
| 34 | 25359352 | G | A | rs1137188  | 59 | 42 | 71.2 | miR-129-5p, miR-876-5p, miR-421, miR-511, miR-513b, miR-624, miR-541*, miR-1290 |   |   |
| 35 | 25359328 | A | T | rs1137189  | 60 | 31 | 51.7 | miR-380, miR-32*                                                                |   | ✓ |
| 36 | 25359320 | C | T | Novel 18   | 61 | 2  | 3.3  | miR-380, miR-32*                                                                |   | ✓ |
| 37 | 25359230 | G | A | Novel 19   | 61 | 1  | 1.6  | miR-365, miR-24-1*, miR-24-2*, miR-3121                                         |   | ✓ |
| 38 | 25359226 | G | A | Novel 20   | 61 | 26 | 42.6 | miR-365                                                                         |   | ✓ |
| 39 | 25359084 | T | C | Novel 21   | 61 | 2  | 3.3  | miR-143, miR-19ab, miR-524-5p, miR-520d-5p, miR-381, miR-300, miR-3163          |   |   |
| 40 | 25359074 | G | T | Novel 22   | 61 | 3  | 4.9  | miR-300, miR-381, miR-520d-5p, miR-524-5p, miR-143, miR-3163, miR-551b*         |   | ✓ |
| 41 | 25358969 | T | C | rs1137196  | 61 | 23 | 37.7 | miR-129-5p                                                                      |   |   |
| 42 | 25358943 | T | C | rs8720     | 61 | 45 | 73.8 | none                                                                            |   |   |
| 43 | 25358828 | T | G | rs12587    | 64 | 55 | 85.9 | miR-425                                                                         |   |   |
| 44 | 25358650 | A | T | rs12245    | 64 | 54 | 84.4 | miR-421, miR-143                                                                |   |   |

**Sup. Table 3. The sequence variation identified in our NSCLC cases**

A total of 44 sites with sequence variation, which consist of 22 known SNPs and 22 novel variants (or somatic mutations), were identified from sequencing genomic DNA from a maximum 70 lung tumor samples.

## A.

|    | chr12<br>(hg19) | Ancestral | Derived | SNP ID      | Freq | %<br>Freq | Allele<br>frequency<br>(AF)<br>in<br>cases | AF<br>in<br>Euro<br>pean | Fold<br>enrichment<br>(Case/Eur) | p-<br>value | Putative miRNA<br>complementary sites<br>(microRNA.org and<br>TargetScan)                 | LCS | Ago<br>binding |
|----|-----------------|-----------|---------|-------------|------|-----------|--------------------------------------------|--------------------------|----------------------------------|-------------|-------------------------------------------------------------------------------------------|-----|----------------|
| 1  | 25362552        | A         | C       | rs712       | 26   | 83.9      | 0.597                                      | 0.54                     | 1.11                             | 0.43        | miR-422a,miR-330-5p, miR-3125, miR-877, miR-378bc, miR-1299, miR-193b, miR-200bc, miR-429 | ✓   | ✓              |
| 2  | 25362465        | G         | A       | rs4285970   | 31   | 100.0     | 1                                          | 1                        | 1.00                             | 1.00        | 501-3p, miR-502-3p,miR-217, miR-4323                                                      |     |                |
| 3  | 25362425        | G         | A       | Novel 1     | 1    | 3.2       | 0.016<br>1                                 | NA                       | NA                               | NA          | miR-23ab, miR-377, miR-181abcd, miR-4262, miR-543                                         |     | ✓              |
| 4  | 25362217        | A         | G       | rs9266      | 25   | 80.6      | 0.581                                      | 0.54                     | 1.08                             | 0.60        | miR-181abcd, miR-4262, miR-132                                                            |     | ✓              |
| 5  | 25361905        | A         | G       | rs61763589  | 1    | 3.2       | 0.016                                      | 0                        | NA                               | NA          | miR-384, miR-202*, miR-590-3p, miR-580                                                    |     |                |
| 6  | 25361756        | C         | A       | rs61763590  | 4    | 12.9      | 0.081                                      | 0.09                     | 0.90                             | 1.00        | miR-133ab, miR-421                                                                        |     |                |
| 7  | 25361646        | T         | C       | rs7960917   | 7    | 22.6      | 0.113                                      | 0.21                     | 0.54                             | 0.07        |                                                                                           |     |                |
| 8  | 25361142        | A         | G       | rs7973450   | 8    | 25.8      | 0.129                                      | 0.21                     | 0.61                             | 0.14        | miR-143, miR-302c*                                                                        |     | ✓              |
| 9  | 25361091        | T         | C       | rs4597149   | 31   | 100.0     | 1.000                                      | 1                        | 1.00                             | 1.00        | miR-410, miR-340, miR-376c                                                                |     | ✓              |
| 10 | 25361074        | G         | A       | rs7973623   | 8    | 25.8      | 0.129                                      | 0.21                     | 0.61                             | 0.14        | miR-501-5p                                                                                |     | ✓              |
| 11 | 25360224        | A         | C       | rs61764370  | 6    | 19.4      | 0.097                                      | 0.09                     | 1.08                             | 0.82        | miR-18a,b                                                                                 | ✓   |                |
| 12 | 25360138        | T         | C       | rs4963858   | 31   | 100.0     | 1.000                                      | 1                        | 1.00                             | 1.00        | miR-599, miR-148a,b, miR-152, miR-199a,b-5p                                               |     |                |
| 13 | 25359898        | A         | G       | rs191137453 | 1    | 3.2       | 0.016                                      | 0                        | NA                               | NA          | miR-26a,b                                                                                 |     |                |
| 14 | 25359841        | T         | C       | rs13096     | 24   | 77.4      | 0.565                                      | 0.54                     | 1.05                             | 0.79        | miR-101, miR-144, miR-493*, let-7a-2*, let-7g*                                            |     | ✓              |
| 15 | 25359577        | C         | T       | rs61764371  | 2    | 6.5       | 0.032                                      | 0                        | NA                               | NA          | let-7 family, miR-202                                                                     | ✓   | ✓              |
| 16 | 25359352        | G         | A       | rs1137188   | 25   | 80.6      | 0.581                                      | 0.54                     | 1.08                             | 0.60        | miR-129-5p, miR-876-5p, miR-421, miR-511, miR-513b, miR-624, miR-541*, miR-1290           |     |                |

|    |          |   |   |            |    |      |       |      |      |      |                  |  |   |
|----|----------|---|---|------------|----|------|-------|------|------|------|------------------|--|---|
| 17 | 25359328 | A | T | rs1137189  | 26 | 83.9 | 0.597 | 0.54 | 1.11 | 0.43 | miR-32*, miR-380 |  | ✓ |
| 18 | 25358969 | T | G | rs1137196  | 24 | 77.4 | 0.516 | 0.44 | 1.17 | 0.29 | miR-129-5p       |  |   |
| 19 | 25358943 | T | C | rs8720     | 25 | 80.6 | 0.581 | 0.54 | 1.08 | 0.60 | miR-2115*        |  |   |
| 20 | 25358828 | T | G | rs12587    | 26 | 83.9 | 0.597 | 0.54 | 1.11 | 0.43 | miR-425          |  |   |
| 21 | 25358650 | A | T | rs12245    | 16 | 51.6 | 0.435 | 0.54 | 0.81 | 0.14 | miR-421, miR-143 |  |   |
| 22 | 25358418 | T | C | rs61764374 | 1  | 3.2  | 0.016 | 0.05 | 0.32 | 0.35 | miR-186          |  |   |

**B.**

|   | Hg19     | Ancestral | Derived | SNP ID  | Frequency | % Frequency | Allele frequency (AF) by SAMtools | AF by GATK             |
|---|----------|-----------|---------|---------|-----------|-------------|-----------------------------------|------------------------|
| 1 | 25360449 | C         | A       | Novel 2 | 12        | 38.7        | 0.1935                            | Identified as an indel |
| 2 | 25360447 | A         | C       | Novel 3 | 4         | 12.9        | 0.0645                            | Not identified         |
| 3 | 25359466 | A         | C       | Novel 4 | 3         | 9.7         | 0.0484                            | Not identified         |
| 4 | 25359465 | A         | T       | Novel 5 | 3         | 9.7         | 0.0484                            | Not identified         |
| 5 | 25358670 | T         | C       | Novel 6 | 2         | 6.5         | 0.0323                            | Not identified         |
| 6 | 25358669 | T         | C       | Novel 7 | 5         | 16.1        | 0.0806                            | Not identified         |
| 7 | 25358664 | T         | C       | Novel 8 | 2         | 6.5         | 0.0323                            | Not identified         |

**Sup. Table 4. The sequence variation identified in our 31 EOC cases**

A. A total of 22 sites with sequence variation, which consist of 21 known SNPs and 1 novel variant, were identified from sequencing germline DNA. To measure fold enrichment, allele frequency of derived allele at each varying site was compared between our cases and European controls reported in the 1000 Genomes Project. B. 7 novel variants were identified by SAMtools only.

| chr12<br>(hg19) | Ancestral | Derived | SNP ID | % Freq of NSCLC cases with the derived allele | Derived allele frequency in EOC cases | Putative miRNA complementary sites | LCS | Ago binding |
|-----------------|-----------|---------|--------|-----------------------------------------------|---------------------------------------|------------------------------------|-----|-------------|
|-----------------|-----------|---------|--------|-----------------------------------------------|---------------------------------------|------------------------------------|-----|-------------|



|    |          |   |   |             |      |       |                                                                                            |   |   |
|----|----------|---|---|-------------|------|-------|--------------------------------------------------------------------------------------------|---|---|
| 1  | 25362552 | A | C | rs712       | 75.4 | 0.597 | miR-422a,miR-330-5p, miR-3125, miR-877, miR-378bc, miR-1299, miR-193b, miR-200b,c, miR-429 | ✓ | ✓ |
| 2  | 25362465 | G | A | rs4285970   | N/A  | 1     | 501-3p, miR-502-3p,miR-217, miR-4323                                                       |   |   |
| 3  | 25362422 | A | C | rs1141947   | 1.8  | N/A   | miR-181a,b,c,d, miR-23a,b,miR-377, miR-543, miR-4262                                       |   | ✓ |
| 4  | 25362217 | A | G | rs9266      | 68.5 | 0.581 | miR-181a,b,c,d, miR-4262, miR-132                                                          |   | ✓ |
| 5  | 25361905 | A | G | rs61763589  | N/A  | 0.016 | miR-384, miR-202*, miR-590-3p, miR-580                                                     |   |   |
| 6  | 25361756 | C | A | rs61763590  | 7.1  | 0.081 | miR-133ab, miR-421                                                                         |   |   |
| 7  | 25361667 | C | T | rs61763591  | 1.9  | N/A   | miR-200a, miR-141, miR-425, miR-3166                                                       |   |   |
| 8  | 25361646 | T | C | rs7960917   | 16.7 | 0.113 | none                                                                                       |   |   |
| 9  | 25361142 | A | G | rs7973450   | 20   | 0.129 | miR-143, miR-302c*                                                                         |   | ✓ |
| 10 | 25361091 | T | C | rs4597149   | 90.9 | 1     | miR-410, miR-340, miR-376c                                                                 |   | ✓ |
| 11 | 25361074 | G | A | rs7973623   | 16.4 | 0.129 | miR-501-5p                                                                                 |   | ✓ |
| 12 | 25360559 | G | C | rs61764367  | 14.8 | N/A   | miR-145*                                                                                   |   |   |
| 13 | 25360545 | T | C | rs61764368  | 1.6  | N/A   | miR-630, miR-665,                                                                          |   |   |
| 14 | 25360358 | G | A | rs61764369  | 1.6  | N/A   | none                                                                                       | ✓ |   |
| 15 | 25360224 | A | C | rs61764370  | 21.4 | 0.097 | miR-18ab                                                                                   | ✓ |   |
| 16 | 25360138 | T | C | rs4963858   | 98.5 | 1     | miR-599, miR-148a,b, miR-152, miR-199a,b-5p                                                |   |   |
| 17 | 25359898 | A | G | rs191137453 | N/A  | 0.016 | miR-26a,b                                                                                  |   |   |
| 18 | 25359841 | T | C | rs13096     | 85.9 | 0.565 | miR-101, miR-144, miR-493*, let-7a-                                                        |   | ✓ |

|    |          |   |   |            |      |       |                                                                                 |   |   |
|----|----------|---|---|------------|------|-------|---------------------------------------------------------------------------------|---|---|
| 18 | 25359841 | T | C | rs13096    | 85.9 | 0.565 | miR-101, miR-144, miR-493*, let-7a-2*, let-7g*                                  |   | ✓ |
| 19 | 25359577 | C | T | rs61764371 | 3.3  | 0.032 | let-7 family, miR-202                                                           | ✓ | ✓ |
| 20 | 25359352 | G | A | rs1137188  | 71.2 | 0.581 | miR-129-5p, miR-876-5p, miR-421, miR-511, miR-513b, miR-624, miR-541*, miR-1290 |   |   |
| 21 | 25359328 | A | T | rs1137189  | 51.7 | 0.597 | miR-380, miR-32*                                                                |   | ✓ |
| 22 | 25358969 | T | C | rs1137196  | 37.7 | 0.516 | miR-129-5p                                                                      |   |   |
| 23 | 25358943 | T | C | rs8720     | 73.8 | 0.581 | none                                                                            |   |   |
| 24 | 25358828 | T | G | rs12587    | 85.9 | 0.597 | miR-425                                                                         |   |   |
| 25 | 25358650 | A | T | rs12245    | 84.4 | 0.435 | miR-421, miR-143                                                                |   |   |
|    |          |   |   |            |      |       |                                                                                 |   |   |

**Sup. Table 5. The union of known SNPs identified in both NSCLC and EOC cases**

A total of 26 known SNPs were identified in our NSCLC and EOC cases. LCS: *let-7* complementary site

|  |                     |                                                                             |  |
|--|---------------------|-----------------------------------------------------------------------------|--|
|  | Available for known | miRNA complementary sites predicted by the Miranda algorithm with a default |  |
|--|---------------------|-----------------------------------------------------------------------------|--|

|   |               |                                      |                                 | SNPs                    |                  |                                   |                  | setting                      |                                                               |                                                                                                                                                                                                                    |                                                                                                                                                                   |                                                            |                                                                                                                           |                                                                |
|---|---------------|--------------------------------------|---------------------------------|-------------------------|------------------|-----------------------------------|------------------|------------------------------|---------------------------------------------------------------|--------------------------------------------------------------------------------------------------------------------------------------------------------------------------------------------------------------------|-------------------------------------------------------------------------------------------------------------------------------------------------------------------|------------------------------------------------------------|---------------------------------------------------------------------------------------------------------------------------|----------------------------------------------------------------|
|   |               |                                      |                                 | Patrocl<br>es<br>(8mer) |                  | miRNASN<br>P (default<br>setting) |                  |                              |                                                               |                                                                                                                                                                                                                    |                                                                                                                                                                   |                                                            |                                                                                                                           |                                                                |
|   | Chr12<br>hg19 | A<br>n<br>c<br>e<br>t<br>r<br>a<br>l | D<br>e<br>r<br>i<br>v<br>e<br>d | SNP<br>ID               | G<br>a<br>i<br>n | L<br>o<br>s<br>s                  | G<br>a<br>i<br>n | L<br>o<br>s<br>s             | Target sequence used                                          | With the ancestral<br>allele                                                                                                                                                                                       | With the derived allele                                                                                                                                           | Gain<br>with<br>the<br>derived<br>allele                   | Loss with<br>the<br>derived<br>allele                                                                                     | lost high<br>confidence miR<br>complementary<br>sites with SNP |
| 1 | 25362<br>573  | T                                    | G                               | Novel<br>1              |                  |                                   |                  |                              | TTAAATGCTTATT<br>TTAAAATGACaGT<br>GGAAAGTTTTTTTT<br>TCCTCtAAG | miR-4668-5p,miR-<br>548ae,miR-548ah-<br>3p,miR-548aq-<br>3p,miR-548x-3p,miR-<br>3916,miR-548aj-<br>3p,miR-3613-3p,miR-<br>3148,miR-548am-<br>3p,miR-5582-3p                                                        | miR-4668-5p,miR-<br>1323,miR-548ae,miR-<br>548ah-3p,miR-548aq-<br>3p,miR-548x-3p,miR-<br>3916,miR-548aj-3p,miR-<br>3613-3p,miR-3148,miR-<br>548am-3p,miR-5582-3p  | miR-<br>1323                                               |                                                                                                                           |                                                                |
| 2 | 25362<br>552  | A                                    | C                               | rs712                   | n<br>o<br>n<br>e | n<br>o<br>n<br>e                  |                  | miR-<br>877,<br>miR-<br>3125 | CAGTGAAGTTTT<br>TTTTTCCTCtAAGT<br>GCCAGTATCCCA<br>GAGTTT      | miR-200c-3p,miR-<br>429,miR-330-5p,miR-<br>3125,miR-3915,miR-<br>514a-5p,miR-<br>3916,miR-378c,miR-<br>5588-5p,miR-200b-<br>3p,miR-4646-5p,miR-<br>877-5p                                                          | miR-200c-3p,miR-<br>429,miR-330-5p,miR-<br>3915,miR-514a-5p,miR-<br>3916,miR-516a-5p,miR-<br>200b-3p,miR-4646-5p                                                  | miR-<br>516a-<br>5p                                        | miR-<br>3125,<br>miR-<br>378c,miR-<br>5588-<br>5p,miR-<br>877-<br>5p,miR-<br>514a-5p                                      | miR-378, miR-<br>3125, miR-877                                 |
| 3 | 25362<br>534  | C                                    | T                               | Novel<br>2              |                  |                                   |                  |                              | TCCTCTAAGTGCC<br>AGTATTCCCAGAG<br>TTTTGGTTTTTGA<br>ACTAGCA    | miR-4314,miR-548d-<br>3p,miR-4432,miR-<br>548h-3p,miR-548t-<br>3p,miR-1323,miR-<br>548aa,miR-330-<br>5p,miR-548ap-<br>3p,miR-548ac,miR-<br>514a-5p,miR-548o-<br>3p,miR-204-3p,miR-<br>4646-5p,miR-<br>548z,miR-326 | miR-548d-3p,miR-548h-<br>3p,miR-548t-3p,miR-<br>1323,miR-548aa,miR-<br>548ap-3p,miR-450a-<br>3p,miR-548ac,miR-<br>548o-3p,miR-561-<br>5p,miR-548z,miR-5582-<br>3p | miR-<br>450a-<br>3p,miR-<br>561-<br>5p,miR-<br>5582-<br>3p | miR-<br>4314,miR-<br>-<br>4432,miR-<br>-330-<br>5p,miR-<br>514a-<br>5p,miR-<br>204-<br>3p,miR-<br>4646-<br>5p,miR-<br>326 | miR-4314,<br>miR-326                                           |

|    |          |   |   |           |                  |          |                                 |  |                                                            |                                                                                                                                                                 |                                                                                                                            |                                    |                                                              |                   |
|----|----------|---|---|-----------|------------------|----------|---------------------------------|--|------------------------------------------------------------|-----------------------------------------------------------------------------------------------------------------------------------------------------------------|----------------------------------------------------------------------------------------------------------------------------|------------------------------------|--------------------------------------------------------------|-------------------|
| 4  | 25362532 | C | A | Novel 3   |                  |          |                                 |  | CTCtAAGTGCCAG<br>TATTCCCAGAgTT<br>TTGGTTTTTGAAC<br>TAGCAAT | miR-4314,miR-548d-3p,miR-4432,miR-548h-3p,miR-548t-3p,miR-1323,miR-548aa,miR-330-5p,miR-548ap-3p,miR-548ac,miR-514a-5p,miR-548o-3p,miR-449c-3p,miR-548z,miR-326 | miR-4314,miR-548d-3p,miR-548h-3p,miR-548t-3p,miR-548aa,miR-548ap-3p,miR-548ac,miR-449c-3p,miR-3156-5p,miR-548c-3p,miR-548z | miR-548c-3p,miR-3156-5p            | miR-4432,miR-1323,miR-330-5p,miR-514a-5p,miR-548o-3p,miR-326 |                   |
| 5  | 25362481 | C | T | Novel 4   |                  |          |                                 |  | GAAAAAGAAACT<br>GAATACCTAAgAT<br>TTCTGTCTTGGGG<br>TTTTTGGT | miR-548d-3p,miR-548h-3p,miR-590-3p,miR-652-5p,miR-1324,miR-4662a-3p,miR-5695,miR-548c-3p,miR-548z,miR-548as-3p                                                  | miR-548d-3p,miR-548h-3p,miR-590-3p,miR-652-5p,miR-1324,miR-4662a-3p,miR-5695,miR-548c-3p,miR-548z,miR-4775,miR-548as-3p    | miR-4775                           |                                                              |                   |
| 6  | 25362422 | A | C | rs1141947 | n<br>o<br>n<br>e | non<br>e | mi<br>R-<br>36<br>14<br>-<br>5p |  | TTACTTCTTATTT<br>TTCTTACCAAtTG<br>TGAATGTTGGTGT<br>GAAACAA | miR-1179,miR-3692-3p,miR-543,miR-181d,miR-181c-5p,miR-27a-3p,miR-181b-5p,miR-4262,miR-4490,miR-181a-5p,miR-27b-3p                                               | miR-1179,miR-342-3p,miR-543,miR-3591-3p,miR-3614-5p,miR-181d,miR-181c-5p,miR-181b-5p,miR-4262,miR-4490,miR-181a-5p         | miR-342-3p,miR-3591-3p,miR-3614-5p | miR-3692-3p,miR-27a-3p,miR-27b-3p                            |                   |
| 7  | 25362217 | A | G | rs9266    | n<br>o<br>n<br>e | non<br>e |                                 |  | TCCTATAGTTTGT<br>CATCCCTGAtGAA<br>TGTAAGTTACA<br>CTGTTAC   | miR-181d,miR-181c-5p,miR-181b-5p,miR-4262,miR-4518,miR-181a-5p                                                                                                  | miR-4518,miR-4775                                                                                                          | miR-4775                           | miR-181abcd,miR-4518                                         | miR-181, miR-4262 |
| 8  | 25362033 | G | C | Novel 5   |                  |          |                                 |  | AGATAAATTACT<br>ATAAAGACTCcTA<br>ATAGCTTTTCCTG<br>TTAAGGCA | miR-3153,miR-548x-5p,miR-548aj-5p,miR-302d-5p,miR-548at-5p,miR-924,miR-548g-5p,miR-4294                                                                         | miR-3153,miR-548x-5p,miR-548aj-5p,miR-302d-5p,miR-548at-5p,miR-924,miR-548g-5p                                             |                                    | miR-4294                                                     | miR-4294          |
| 9  | 25361966 | G | C | Novel 6   |                  |          |                                 |  | TTATTATAGCAAC<br>CATTTTGGGGcTA<br>TATTTACATGCTA<br>CTAAATT | miR-4323,miR-3668,miR-3651,miR-4495,miR-32-3p,miR-3935,miR-16-5p                                                                                                | miR-4460,miR-4495,miR-32-3p,miR-16-5p                                                                                      | miR-4460                           | miR-4323,miR-3668,miR-3651,miR-3935                          | miR-4323          |
| 10 | 25361950 | G | C | Novel 7   |                  |          |                                 |  | TTGGGGcTATATT<br>TACATGCTAcTAA<br>ATTTTTATAATAA<br>TTGAAAA | miR-4282,miR-126-5p,miR-944,miR-32-3p,miR-16-5p                                                                                                                 | miR-4282,miR-126-5p,miR-944,miR-32-3p,miR-16-5p                                                                            |                                    |                                                              |                   |

|        |              |   |   |                |  |  |  |                                                             |                                                                                             |                                                                            |                                                                                                 |                                                                                   |                       |
|--------|--------------|---|---|----------------|--|--|--|-------------------------------------------------------------|---------------------------------------------------------------------------------------------|----------------------------------------------------------------------------|-------------------------------------------------------------------------------------------------|-----------------------------------------------------------------------------------|-----------------------|
| 1<br>1 | 25361<br>932 | A | T | Novel<br>8     |  |  |  | TGCTACTAAATTT<br>TTATAATAATtGA<br>AAAGATTTTAAC<br>AAGTATAA  | miR-126-5p,miR-<br>944,miR-548c-3p                                                          | miR-126-5p,miR-<br>944,miR-548c-3p                                         |                                                                                                 |                                                                                   |                       |
| 1<br>2 | 25361<br>888 | A | T | Novel<br>9     |  |  |  | AAAAAATTCTCA<br>TAGGAATTTAAAtG<br>TAGTCTCCCTGTG<br>TCAGACTG | miR-4270,miR-4441                                                                           | miR-4270,miR-4441                                                          |                                                                                                 |                                                                                   |                       |
| 1<br>3 | 25361<br>863 | G | A | Novel<br>10    |  |  |  | TAGTCTCCCTGTG<br>TCAGACTGCTcTT<br>TCATAGTATAACT<br>TTAAATC  | miR-1276,miR-<br>2278,miR-4274,miR-<br>548at-5p,miR-4712-<br>3p,miR-4766-5p,miR-<br>4670-3p | miR-4274,miR-<br>3185,miR-3688-3p,miR-<br>548at-5p,miR-4670-3p             | miR-<br>3185,m<br>iR-<br>3688-<br>3p                                                            | miR-<br>1276,<br>miR-<br>2278,miR-<br>4712-<br>3p,miR-<br>4766-5p                 | miR-1276,<br>miR-2278 |
| 1<br>4 | 25361<br>771 | C | G | Novel<br>11    |  |  |  | ACATTAAAAGAT<br>TATTTGGGCCAgT<br>TATAGCTTATTAG<br>GTGTTGAA  | miR-3161,miR-193b-<br>3p,miR-3065-3p                                                        | miR-3677-5p,miR-<br>3161,miR-4795-5p,miR-<br>663b,miR-3545-5p,miR-<br>5693 | miR-<br>3677-<br>5p,miR-<br>4795-<br>5p,miR-<br>-<br>663b,m<br>iR-<br>3545-<br>5p,miR-<br>-5693 | miR-<br>193b-3p,<br>miR-<br>3065-3p,<br>miR-<br>193a-3p                           | miR-193a*             |
| 1<br>5 | 25361<br>756 | C | A | rs617<br>63590 |  |  |  | TTGGGCCAGTTAT<br>AGCTTATTAGgTG<br>TTGAAGAGACCA<br>AGGTTGCA  | miR-5002-5p,miR-<br>3065-3p,miR-<br>1305,miR-676-5p                                         | miR-5583-5p,miR-<br>549,miR-1305,miR-676-<br>5p,miR-3129-3p                | miR-<br>5583-<br>5p,miR-<br>-<br>549,mi<br>R-<br>3129-<br>3p                                    | miR-<br>5002-<br>5p,miR-<br>3065-3p                                               |                       |
| 1<br>6 | 25361<br>722 | A | G | Novel<br>12    |  |  |  | ACCAAGGTTGCA<br>AGGCCAGGCCctG<br>TGTGAACCTTTGA<br>GCTTTCAT  | miR-557,miR-485-<br>3p,miR-3918,miR-<br>4512,miR-2861,miR-<br>3158-3p,miR-377-3p            | miR-557,miR-744-<br>5p,miR-4717-3p,miR-<br>4462,miR-2861,miR-602           | miR-<br>744-<br>5p,miR-<br>-4717-<br>3p,miR-<br>-<br>4462,m<br>iR-602                           | miR-485-<br>3p,miR-<br>3918,miR-<br>-<br>4512,miR-<br>-3158-<br>3p,miR-<br>377-3p | miR-377               |

|        |              |   |   |                |  |  |                      |                                                                                     |                                                                                                                  |                                                                                                                           |                                                                                                   |                                                                         |  |
|--------|--------------|---|---|----------------|--|--|----------------------|-------------------------------------------------------------------------------------|------------------------------------------------------------------------------------------------------------------|---------------------------------------------------------------------------------------------------------------------------|---------------------------------------------------------------------------------------------------|-------------------------------------------------------------------------|--|
| 1<br>7 | 25361<br>683 | A | G | Novel<br>13    |  |  |                      | CTTTCATAGAGA<br>GTTTCACAGCA <sub>t</sub> G<br>GACTGTGTCCCCA<br>CGGTCATC             | miR-3691-5p,miR-<br>491-5p,miR-141-<br>3p,miR-450a-3p,miR-<br>200a-3p,miR-<br>549,miR-4504,miR-<br>1243,miR-4318 | miR-937,miR-491-<br>5p,miR-4700-5p,miR-<br>4693-5p                                                                        | miR-<br>937,mi<br>R-<br>4700-<br>5p                                                               | miR-<br>450a-<br>3p,miR-<br>455-<br>3p,miR-<br>5581-<br>3p,miR-<br>1302 |  |
| 1<br>8 | 25361<br>667 | C | T | rs617<br>63591 |  |  | mi<br>R-<br>94<br>3  | CACAGCATGGAC<br>TGTGTCCCCAC <sub>g</sub> G<br>TCATCCAGTGTG<br>TCA <sub>t</sub> GCAT | miR-3691-5p,miR-<br>491-5p,miR-141-<br>3p,miR-450a-3p,miR-<br>200a-3p,miR-<br>549,miR-4504,miR-<br>1243,miR-4318 | miR-3691-5p,miR-491-<br>5p,miR-141-3p,miR-<br>450a-3p,miR-200a-<br>3p,miR-549,miR-<br>4504,miR-1243,miR-<br>4318          |                                                                                                   |                                                                         |  |
| 1<br>9 | 25361<br>649 | A | G | Novel<br>14    |  |  |                      | CCCACGGTCATCC<br>AGTGTGTCatGC<br>ATTGGTTAGTCAA<br>AATGGGG                           | miR-148b-3p,miR-<br>152,miR-136-5p,miR-<br>5700,miR-4504,miR-<br>148a-3p                                         | miR-136-5p,miR-542-<br>3p,miR-4504                                                                                        | miR-<br>542-<br>3p,miR<br>-4504                                                                   | miR-<br>148b-<br>3p,miR-<br>152,miR-<br>5700,miR<br>-148a-3p            |  |
| 2<br>0 | 25361<br>646 | T | C | rs796<br>0917  |  |  | mi<br>R-<br>39<br>12 | ACGGTCATCCAG<br>TGTTGTCATGC <sub>a</sub> T<br>TGGTTAGTCAAAA<br>ATGGGGAGG            | miR-148b-3p,miR-<br>152,miR-136-5p,miR-<br>5700,miR-148a-3p                                                      | miR-3912,miR-152,miR-<br>5700                                                                                             | miR-<br>3912                                                                                      | miR-<br>148b-<br>3p,miR-<br>136-<br>5p,miR-<br>148a-3p                  |  |
| 2<br>1 | 25361<br>645 | A | G | Novel<br>15    |  |  |                      | CGGTCATCCAGT<br>GTTGTCA <sub>t</sub> GCATT<br>GGTTAGTCAAAA<br>TGGGGAGGG             | miR-148b-3p,miR-<br>152,miR-136-5p,miR-<br>5700,miR-148a-3p                                                      | miR-148b-3p,miR-<br>152,miR-2052,miR-<br>199b-5p,miR-1825,miR-<br>148a-3p,miR-4676-<br>5p,miR-3136-5p                     | miR-<br>2052,m<br>iR-<br>199b-<br>5p,miR<br>-<br>1825,m<br>iR-<br>4676-<br>5p,miR<br>-3136-<br>5p | miR-136-<br>5p,miR-<br>5700                                             |  |
| 2<br>2 | 25361<br>621 | G | C | Novel<br>16    |  |  |                      | TGGTTAGTCAAAA<br>ATGGGGAGGG <sub>a</sub> c<br>TAGGGCAGTTTG<br>GATAGCTCAA            | miR-3157-3p,miR-<br>554,miR-18a-3p,miR-<br>2114-5p,miR-548av-<br>3p,miR-642a-5p,miR-<br>4769-3p                  | miR-4685-3p,miR-3157-<br>3p,miR-18a-3p,miR-<br>4469,miR-550b-3p,miR-<br>4290,miR-548av-<br>3p,miR-642a-5p,miR-<br>4769-3p | miR-<br>4685-<br>3p,miR<br>-<br>4469,m<br>iR-<br>550b-                                            | miR-<br>554,miR-<br>2114-5p                                             |  |



|    |          |   |   |            |          |      |          |                      |                                                 |                                                                                                                                     |                                                                                                                            |                                                     |                                               |         |
|----|----------|---|---|------------|----------|------|----------|----------------------|-------------------------------------------------|-------------------------------------------------------------------------------------------------------------------------------------|----------------------------------------------------------------------------------------------------------------------------|-----------------------------------------------------|-----------------------------------------------|---------|
| 30 | 25360224 | A | C | rs61764370 |          |      |          | miR-34b, miR-1262    | TCGAACTCCTGACCTCAAGTGATtCACCCACCTTGGCCTCATAAAC  | miR-4761-5p, miR-34b-3p, miR-1262, miR-363-5p, miR-4701-3p                                                                          | miR-4761-5p                                                                                                                |                                                     | miR-34b-3p, miR-1262, miR-363-5p, miR-4701-3p |         |
| 31 | 25360138 | T | C | rs4963858  | miR-147b | none | miR-147b | miR-147, miR-581     | GTGCCTACCAGATGCCAGTCACCgCACAAAGGCACTGGGTATATGGT | miR-4312, miR-147b, miR-3130-5p, miR-4482-5p, miR-515-3p, miR-1825, miR-519e-3p, miR-33b-3p                                         | miR-4312, miR-1294, miR-3130-5p, miR-4482-5p, miR-4783-3p, miR-515-3p, miR-1825, miR-519e-3p, miR-33b-3p                   | miR-1294                                            | miR-147b                                      |         |
| 32 | 25359841 | T | C | rs13096    |          |      |          | miR-2355-3p, miR-676 | TTTGGCATAACTGTGATTCTTTTaGGACAATTACTGTACACATTAA  | let-7g-3p, miR-2355-3p, miR-676-3p, miR-219-5p, miR-1244, miR-3177-5p, let-7a-2-3p, miR-4766-5p                                     | let-7g-3p, miR-219-5p, miR-1244, miR-4646-3p, miR-548x-5p, miR-548aj-5p, miR-3177-5p, let-7a-2-3p, miR-548g-5p             | miR-4646-3p, miR-548x-5p, miR-548aj-5p, miR-548g-5p | miR-2355-3p, miR-676-3p, miR-4766-5p          |         |
| 33 | 25359577 | C | T | rs61764371 |          |      |          |                      | TGTTAAGACTTACACAGTACCTCGTTTCTACACAGAGAAAGAAATG  | miR-147a                                                                                                                            | miR-5680, miR-143-3p, miR-147a, miR-5093                                                                                   | miR-5680, miR-143-3p, miR-5093                      |                                               |         |
| 34 | 25359352 | G | A | rs1137188  | none     | none |          |                      | TGTTAAGACTTACACAGTACCTCGTTTCTACACAGAGAAAGAAATG  | miR-541-5p, miR-511, miR-302b-5p, miR-548u, miR-548ah-3p, miR-548aq-3p, miR-1290, miR-676-5p, miR-302d-5p, miR-561-5p, miR-548am-3p | miR-541-5p, miR-302b-5p, miR-548u, miR-548ah-3p, miR-548aq-3p, miR-1290, miR-676-5p, miR-302d-5p, miR-561-5p, miR-548am-3p |                                                     | miR-511                                       | miR-511 |
| 35 | 25359328 | A | T | rs1137189  |          |      |          |                      | AAAAATCCTTGTTGAAGTTTTTtAAAAAAGCTAAATACATAGA     | miR-3658, miR-380-3p, miR-32-3p                                                                                                     | miR-3658, miR-380-3p, miR-32-3p, miR-2054                                                                                  | miR-2054                                            |                                               |         |
| 36 | 25359320 | C | T | Novel18    |          |      |          |                      | TTGTTGAAGTTTTTTAAAAAAAgCTAAATTACATAGACTTAGGCA   | miR-380-3p, miR-32-3p                                                                                                               | miR-5002-5p, miR-380-3p, miR-32-3p                                                                                         | miR-5002-5p                                         |                                               |         |



|    |          |   |   |           |  |  |            |                                                            |                                                                          |                                                                                       |                                                                |                                                     |                   |
|----|----------|---|---|-----------|--|--|------------|------------------------------------------------------------|--------------------------------------------------------------------------|---------------------------------------------------------------------------------------|----------------------------------------------------------------|-----------------------------------------------------|-------------------|
| 37 | 25359230 | G | A | Novel 19  |  |  |            | GTTCCCAAGTAG<br>GCATTcTAGGCTC<br>TATTTAACTGAGT<br>CACACTGC | miR-24-1-5p,miR-3673,miR-515-3p,miR-3116,miR-3121-3p,miR-934,miR-24-2-5p | miR-3116,miR-3121-3p                                                                  |                                                                | miR-24-1-5p,miR-3673,miR-515-3p,miR-934,miR-24-2-5p | miR-24            |
| 38 | 25359226 | G | A | Novel 20  |  |  |            | AGGCTCTATTTAA<br>CTGAGTCACACT<br>GCATAGGAATTT<br>AGAACCTAA | miR-3673,miR-515-3p,miR-3116,miR-3121-3p                                 | miR-17-5p,miR-20a-5p,miR-106a-5p,miR-519d,miR-515-3p,miR-526b-3p,miR-4427,miR-3121-3p | miR-17-5p,miR-20a-5p,miR-106a-5p,miR-519d,miR-526b-3p,miR-4427 | miR-3673,miR-3116                                   |                   |
| 39 | 25359084 | T | C | Novel 21  |  |  |            | GGGCATGTTAAG<br>TTACAGTTTGCaC<br>AAGTTCATCTCAT<br>TTGTATTC | miR-19a-3p,miR-1273f,miR-19b-3p,miR-143-3p,miR-5009-5p,miR-4771,miR-4770 | miR-143-3p,let-7i-3p,miR-5009-5p,miR-4771,miR-4770                                    | let-7i-3p                                                      | miR-19ab-3p,miR-1273f                               | miR-19ab          |
| 40 | 25359074 | G | T | Novel 22  |  |  |            | AGTTACAGTTTGC<br>ACAAGTTCATcTC<br>ATTTGTATTCCAT<br>TGATTTT | miR-551b-5p,miR-1273f,miR-143-3p,miR-4770                                |                                                                                       |                                                                | miR-551b-5p,miR-1273f,miR-143-3p,miR-4770           | miR-551b, miR-143 |
| 41 | 25358969 | T | C | rs1137196 |  |  |            | TTTAGACAGCAA<br>AAACTATCTGAaG<br>ATTTCCATTTGTC<br>AAAAAGTA | miR-3942-3p,miR-3688-3p,miR-4694-3p,miR-5683,miR-182-5p                  | miR-4330,miR-3688-3p,miR-4694-3p,miR-5683,miR-182-5p,miR-4668-3p                      | miR-4330,miR-4668-3p                                           | miR-3942-3p                                         |                   |
| 42 | 25358943 | T | C | rs8720    |  |  | miR-885-5p | TTTCCATTTGTCA<br>AAAAGTAATGaTT<br>TCTTGATAATTGT<br>GTAGTAA | miR-126-5p,miR-539-5p,miR-15b-3p,miR-561-5p                              | miR-885-5p,miR-548t-3p,miR-548a,miR-451a,miR-561-5p,miR-451b                          | miR-885-5p,miR-548t-3p,miR-548aa,                              | miR-126-5p,miR-539-5p,miR-15b-3p                    |                   |



|   |            |        |         | Only available for known SNPs |          |                   |                                                                       |                                                                                                                               |                                                                                                                       |                                                                                |                                                      |                                                       |  |  |
|---|------------|--------|---------|-------------------------------|----------|-------------------|-----------------------------------------------------------------------|-------------------------------------------------------------------------------------------------------------------------------|-----------------------------------------------------------------------------------------------------------------------|--------------------------------------------------------------------------------|------------------------------------------------------|-------------------------------------------------------|--|--|
|   |            |        |         | Patrols (8mer)                |          | mirnasnp          |                                                                       | miRNA complementary sites predicted by the Miranda algorithm with a default setting                                           |                                                                                                                       |                                                                                |                                                      |                                                       |  |  |
|   | Chr12 hg19 | Allele | Derived | SNP ID                        | Gain     | Loss              | Target sequence used                                                  | With the ancestral allele                                                                                                     | With the SNP allele                                                                                                   | Gain with SNP                                                                  | Loss with SNP                                        | lost high confidence miR complementary sites with SNP |  |  |
| 1 | 25362552   | A      | C       | rs712                         | none     | miR-877, miR-3125 | CaGTGGAA<br>GTTTTTTTT<br>TCCTCtAAG<br>TGCCAGTA<br>TTCCCAgAg<br>TTT    | miR-200c-3p,miR-429,miR-330-5p,miR-3125,miR-3915,miR-514a-5p,miR-3916,miR-378c,miR-5588-5p,miR-200b-3p,miR-4646-5p,miR-877-5p | miR-200c-3p,miR-429,miR-330-5p,miR-3915,miR-514a-5p,miR-3916,miR-516a-5p,miR-200b-3p,miR-4646-5p                      | miR-516a-5p                                                                    | miR-3125,miR-378c,miR-5588-5p,miR-877-5p,miR-514a-5p | miR-378, miR-3125, miR-877                            |  |  |
| 2 | 25362465   | G      | A       | rs4285970                     | miR-548z | miR-4323          | ATACCTAA<br>gATTTCTGT<br>CTTGGGGcT<br>TTTGGTGC<br>ATGCAGTT<br>GATTACT | miR-4323,miR-502-3p,miR-217,miR-335-5p,miR-5695,miR-5689,miR-501-3p                                                           | miR-548d-3p,miR-548h-3p,miR-652-5p,miR-548ac,miR-502-3p,miR-217,miR-5695,miR-548c-3p,miR-548z,miR-501-3p,miR-548as-3p | miR-548d-3p,miR-548h-3p,miR-652-5p,miR-548ac,miR-548c-3p,miR-548z,miR-548as-3p | miR-4323,miR-335-5p,miR-5689                         | miR-502-3p,miR-4323                                   |  |  |
| 3 | 25362425   | G      | A       | Novel 1                       |          |                   | TTGATTAC<br>TTCTTATTT<br>TTCTTACcA<br>AtTGtGAAT<br>GTTGGTGT<br>GAAACA | miR-1179,miR-543,miR-181d,miR-181c-5p,miR-27a-3p,miR-181b-5p,miR-4262,miR-4490,miR-181a-5p,miR-27b-3p                         | miR-543,miR-181d,miR-181c-5p,miR-181b-5p,miR-4262,miR-181a-5p,miR-921                                                 | miR-921                                                                        | miR-1179,miR-27a-3p,miR-4490,miR-27b-3p              |                                                       |  |  |
| 4 | 25362217   | A      | G       | rs9266                        | none     |                   | TCCTATAG<br>TTTGTCATC<br>CCTGAtGAA<br>TGtAAAGT<br>TACTACTGT           | miR-181d,miR-181c-5p,miR-181b-5p,miR-4262,miR-4518,miR-181a-5p                                                                | miR-4518,miR-4775                                                                                                     | miR-4775                                                                       | miR-181abcd,miR-4518                                 | miR-181, miR-4262                                     |  |  |

|    |          |   |   |            |                  |                  |          |         | TCAC                                                                   |                                                                              |                                                                 |                                 |                                                         |                            |
|----|----------|---|---|------------|------------------|------------------|----------|---------|------------------------------------------------------------------------|------------------------------------------------------------------------------|-----------------------------------------------------------------|---------------------------------|---------------------------------------------------------|----------------------------|
| 5  | 25361905 | A | G | rs61763589 |                  |                  |          | miR-580 | AAAGATTT<br>TAACAAGT<br>ATAAAAAA<br>tTCTCATAG<br>GAATTAAt<br>GTAGTCT   | miR-202-5p,miR-580,miR-3123,miR-4775                                         | miR-202-5p,miR-4712-3p                                          | miR-4712-3p                     | miR-580,miR-3123,miR-4775                               | miR-384,miR-590-3p,miR-582 |
| 6  | 25361756 | C | A | rs61763590 |                  |                  |          |         | TTGGGCCA<br>gTTATAGCT<br>TATTAGgTG<br>TTGAAGAG<br>ACCAAGGT<br>TGCA     | miR-5002-5p,miR-3065-3p,miR-1305,miR-676-5p                                  | miR-5583-5p,miR-549,miR-1305,miR-676-5p,miR-3129-3p             | miR-5583-5p,miR-549,miR-3129-3p | miR-5002-5p,miR-3065-3p                                 |                            |
| 7  | 25361646 | T | C | rs7960917  |                  |                  | miR-3912 |         | ACgGTCAT<br>CCAGTGTT<br>GTCAtGCatT<br>GGTtagTC<br>AAAATGGG<br>GAGG     | miR-148b-3p,miR-152,miR-136-5p,miR-5700,miR-148a-3p                          | miR-3912,miR-152,miR-5700                                       | miR-3912                        | miR-148b-3p,miR-136-5p,miR-148a-3p                      |                            |
| 8  | 25361142 | A | G | rs7973450  | n<br>o<br>n<br>e | n<br>o<br>n<br>e |          |         | ATCACTTA<br>CTATCCAT<br>TTCTTCAatG<br>TAAAAGA<br>AGTCATCT<br>CAAAC     | miR-302c-5p,miR-302b-5p,miR-143-3p,miR-4517,miR-3915,miR-135a-5p,miR-302d-5p | miR-302b-5p,miR-143-3p,miR-3915,miR-3611,miR-29a-5p,miR-302d-5p | miR-3611,miR-29a-5p             | miR-302c-5p,miR-4517,miR-135a-5p                        |                            |
| 9  | 25361091 | T | C | rs4597149  |                  |                  |          |         | gTTTTTTTT<br>TTTTACAA<br>CTATGTaAT<br>TTATATTCC<br>ATTTAcATA<br>AG     | miR-1,miR-224-5p,miR-3673,miR-4694-3p,miR-4495                               | miR-1,miR-224-5p,miR-3673,miR-4694-3p,miR-4495                  |                                 |                                                         |                            |
| 10 | 25361074 | G | A | rs7973623  |                  |                  |          |         | CTATGTaAT<br>TTATATTCC<br>ATTTAcATA<br>AGGATACA<br>CTTATTTGT<br>CA     | miR-595,miR-4495                                                             | miR-519b-3p,miR-519a-3p,miR-519c-3p,miR-568                     | miR-519abc-3p,miR-568           | miR-595,miR-4495                                        |                            |
| 11 | 25360449 | C | A | Novel 2    |                  |                  |          |         | TCATGAAG<br>CTTAcTTTT<br>TTTTTTTTgGt<br>GTCAGAGT<br>CTCGCTCTT<br>GTCAC | miR-3672, miR-4431, miR-4714-5p, miR-301a-5p, miR-4522, miR-335-5p, miR-4801 | none                                                            | none                            | miR-3672, miR-4431, miR-4714-5p, miR-301a-5p, miR-4522, | miR-335                    |



|    |          |   |   |           |                  |                  |         |                                                                        |                                                                                                                           |                                                                                                                   |                                                                                     |             |  |
|----|----------|---|---|-----------|------------------|------------------|---------|------------------------------------------------------------------------|---------------------------------------------------------------------------------------------------------------------------|-------------------------------------------------------------------------------------------------------------------|-------------------------------------------------------------------------------------|-------------|--|
|    |          |   |   |           |                  |                  |         | GAAATG                                                                 |                                                                                                                           |                                                                                                                   |                                                                                     |             |  |
| 18 | 25359466 | A | C | Novel 4   |                  |                  |         | ATGGGCAT<br>TTTTTAAAG<br>GTAGTGGtT<br>AATTACCT<br>TTATGTGA<br>ACTTTGA  | miR-548ag,miR-570-5p,miR-376c,miR-548m,miR-548ai                                                                          | miR-548ag,miR-570-5p,miR-376c,miR-548m,miR-548ai,miR-196b-5p,miR-4301                                             | miR-196b-5p,miR-4301                                                                |             |  |
| 19 | 25359465 | A | T | Novel 5   |                  |                  |         | TGGGCATT<br>TTTTTAAAG<br>GTAGTGGTt<br>AATTACCT<br>TTATGTGA<br>ACTTTGAA | miR-2681-5p,miR-548ag,miR-570-5p,miR-376c,miR-548m,miR-196b-5p,miR-377-3p,miR-548ai                                       | none                                                                                                              | miR-2681-5p,miR-548ag,miR-570-5p,miR-376c,miR-548m,miR-196b-5p,miR-377-3p,miR-548ai | miR-548m    |  |
| 20 | 25359352 | G | A | rs1137188 | n<br>o<br>n<br>e | n<br>o<br>n<br>e | miR-511 | TGTTAAGA<br>CTTACACA<br>GTACCTCG<br>TTTCTACA<br>CAGAGAAA<br>GAAATG     | miR-541-5p,miR-511,miR-302b-5p,miR-548u,miR-548ah-3p,miR-548aq-3p,miR-1290,miR-676-5p,miR-302d-5p,miR-561-5p,miR-548am-3p | miR-541-5p,miR-302b-5p,miR-548u,miR-548ah-3p,miR-548aq-3p,miR-1290,miR-676-5p,miR-302d-5p,miR-561-5p,miR-548am-3p | miR-511                                                                             | miR-511     |  |
| 21 | 25359328 | A | T | rs1137189 |                  |                  |         | AAAAATCC<br>TTGTTGAA<br>GTTTTTtA<br>AAAAAAgC<br>TAAATTAC<br>ATAGA      | miR-3658,miR-380-3p,miR-32-3p                                                                                             | miR-3658,miR-380-3p,miR-32-3p,miR-2054                                                                            | miR-2054                                                                            |             |  |
| 22 | 25358969 | T | G | rs1137196 |                  |                  |         | TTTAGACA<br>GCAAAAAC<br>TATCTGAaG<br>ATTTCCATT<br>TGTCAAAA<br>AGTA     | miR-3942-3p,miR-3688-3p,miR-4694-3p,miR-5683,miR-182-5p                                                                   | miR-4330,miR-3688-3p,miR-4694-3p,miR-5683,miR-182-5p,miR-4668-3p                                                  | miR-4330,miR-4668-3p                                                                | miR-3942-3p |  |

|        |              |   |   |                |                  |                  |            |                                                                       |                                                                                        |                                                                               |                                                    |                                  |  |
|--------|--------------|---|---|----------------|------------------|------------------|------------|-----------------------------------------------------------------------|----------------------------------------------------------------------------------------|-------------------------------------------------------------------------------|----------------------------------------------------|----------------------------------|--|
| 2<br>3 | 25358<br>943 | T | C | rs8720         |                  |                  | miR-885-5p | TTTCCATTT<br>GTCAAAAA<br>GTAATGaTT<br>TCTTGATA<br>ATTGTGTA<br>GTAA    | miR-126-5p,miR-539-5p,miR-15b-3p,miR-561-5p                                            | miR-885-5p,miR-548t-3p,miR-548a,miR-451a,miR-561-5p,miR-451b                  | miR-885-5p,miR-548t-3p,miR-548aa,miR-451a,miR-451b | miR-126-5p,miR-539-5p,miR-15b-3p |  |
| 2<br>4 | 25358<br>828 | T | G | rs12587        |                  |                  |            | TAGCATGA<br>ATTCTGCA<br>TTGAGAAa<br>CTGAATAG<br>CTGTCATA<br>AAATGA    | miR-223-3p                                                                             | miR-657,miR-506-5p                                                            | miR-657                                            | miR-506-5p, miR-223-3p           |  |
| 2<br>5 | 25358<br>670 | T | C | Novel 6        |                  |                  |            | AGGTAATT<br>TAGATGAA<br>TTTAGGGG<br>aaAAAAaAG<br>TTATCTGC<br>AGATATGT | miR-5195-5p,miR-3158-5p,miR-135a-5p,miR-4775                                           | miR-5195-5p,miR-3158-5p,miR-135a-5p,miR-4776,miR-3679-3p,miR-642a-5p          | miR-3679-3p,miR-642a-5p                            |                                  |  |
| 2<br>6 | 25358<br>669 | T | C | Novel 7        |                  |                  |            | GGTAATTT<br>AGATGAAT<br>TTAGGGGaa<br>AAAAaAGT<br>TATCTGCA<br>GatATGTT | miR-5195-5p,miR-3158-5p,miR-135a-5p,miR-4775                                           | miR-5195-5p,miR-3158-5p,miR-135a-5p,miR-4776,miR-629-3p                       | miR-629-3p                                         |                                  |  |
| 2<br>7 | 25358<br>664 | T | C | Novel 8        |                  |                  |            | TTTAGATG<br>AATTTAGG<br>GGaaAAAAa<br>AGTTATCT<br>GCAGatAT<br>GTTGAGGG | miR-1277-5p,miR-3158-5p,miR-135a-5p,miR-4775                                           | miR-3158-5p                                                                   |                                                    | miR-1277-5p,miR-135a-5p,miR-4775 |  |
| 2<br>8 | 25358<br>650 | A | T | rs12245        | n<br>o<br>n<br>e | n<br>o<br>n<br>e | miR-544    | GGGaaAAA<br>AaAGTTATC<br>TGCAGatAT<br>GTTGAGGG<br>CCCATCTC<br>TCCC    | miR-1277-5p,miR-654-5p,miR-4644                                                        | miR-654-5p,miR-4644,miR-3143,miR-16-2-3p,miR-544a                             | miR-3143,miR-16-2-3p, miR-544a                     | miR-1277-5p                      |  |
| 2<br>9 | 25358<br>418 | T | C | rs617643<br>74 |                  |                  |            | AACTGAAA<br>CATGCACA<br>TTTTGTACa<br>TTGTGCTTT<br>CTTTTGTG<br>GGACATA | miR-3171,miR-4311,miR-3613-3p,miR-548x-5p,miR-548aj-5p,miR-524-5p,miR-1283,miR-548g-5p | miR-330-3p,miR-4311,miR-3613-3p,miR-548x-5p,miR-548aj-5p,miR-524-5p,miR-1283, | miR-330-3p,miR-3678-5p                             | miR-3171                         |  |

|  |  |  |  |  |  |  |  |  |  |  |                             |  |  |  |
|--|--|--|--|--|--|--|--|--|--|--|-----------------------------|--|--|--|
|  |  |  |  |  |  |  |  |  |  |  | miR-3678-5p,<br>miR-548g-5p |  |  |  |
|--|--|--|--|--|--|--|--|--|--|--|-----------------------------|--|--|--|

**Sup. Table 7. The effects of the variants identified in EOC cases on putative miRNA complementary sites**

Patrocles with a 8-mer setting, and miRNASNP with a default setting were utilized. Target sequences including alternative alleles were used to predict gain or loss of miRNA complementary sites by the derived allele using the miRanda algorithm with a default setting.



rs17329025 - rs17388148 - rs12424283 - rs10842508 - rs4963859 - rs1137282 - rs712 - rs9266 - rs7973450 - rs61764370 - rs13096 - rs12587 - rs11047892  
 1.627 4.160 6.564 3.624 5.061 0.225 0.335 1.075 0.918 0.383 1.013 0.795 (25.8kb)

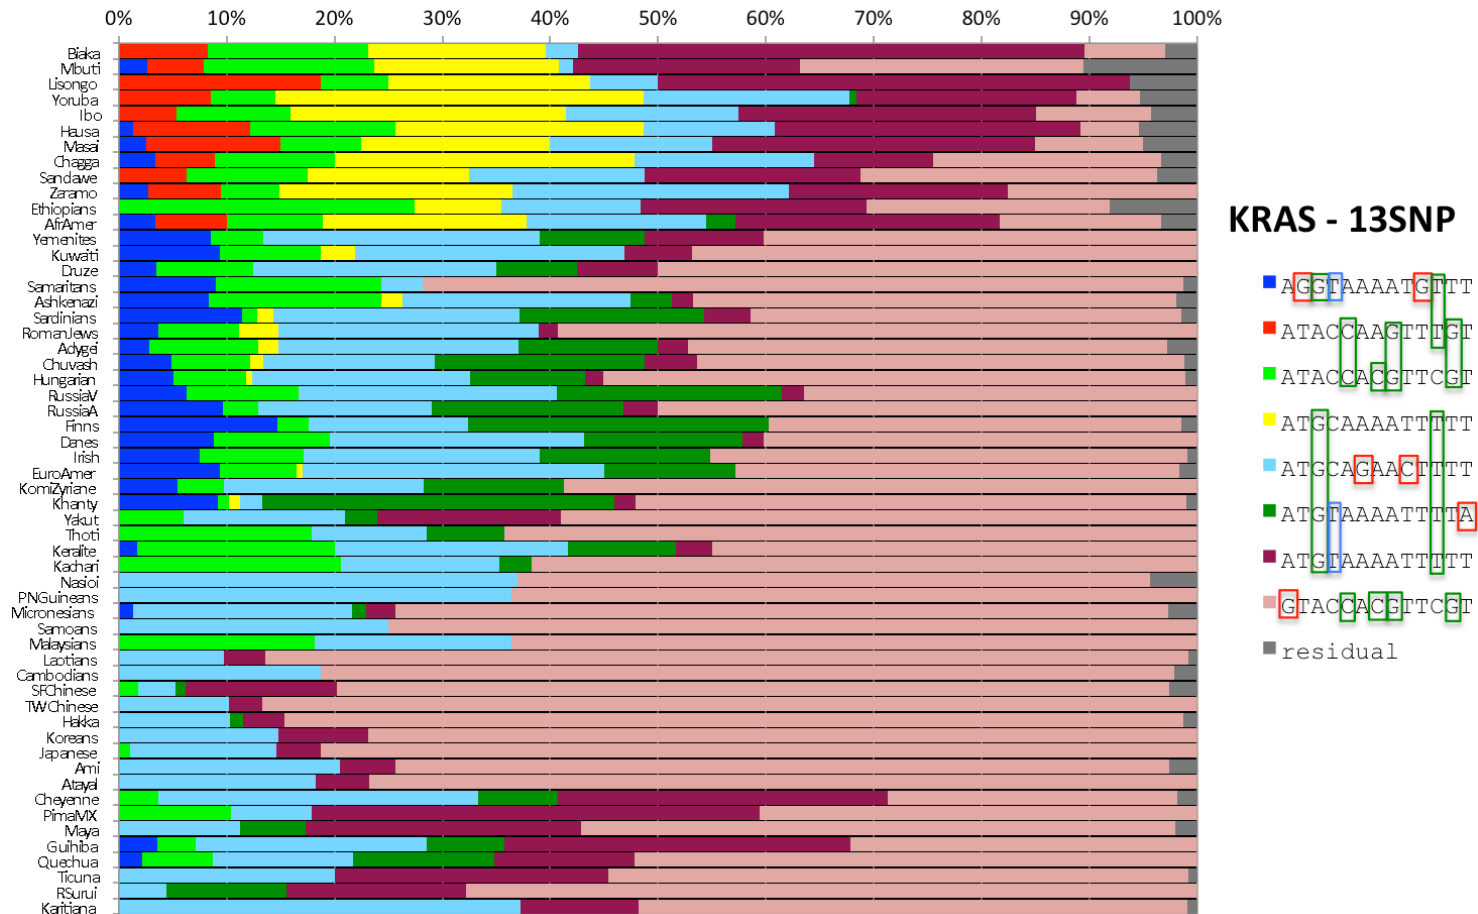

**Sup. Figure 1. The haplotypes with rs712, rs9266, rs61764370 and additional 10 tagging SNPs**

These 11 SNPs include five SNPs in an adjacent intron (rs17329025, rs17388148, rs12424283, rs10842508, and rs4963859), one SNP in the *KRAS* transcript variant A (rs1137282), four SNPs in the 3' UTR of the *KRAS* transcript variant B (rs9266, rs7973450, rs13096, and rs12587) and one SNP in an intergenic region of the 3' UTR of the *KRAS* (rs11047892). In all eight haplotypes that were identified, the derived alleles (the G alleles) at rs712 and rs61764370 were never found together in cis.

### Ancestral allele (T) at rs712

mfe: -12.0 kcal/mol  
target 5' U U 3'  
UUUU CCUCU  
AAGA GGAGG  
miR-378b 3' C UUCAGGUCA 5'

mfe: -11.5 kcal/mol  
target 5' U UC 3'  
UUUUUUU CUCU  
GAGAAGA GAGG  
miR-378c 3' GGU CU UUCAGGUCA 5'

mfe: -16.6 kcal/mol  
target 5' G GAA UUUU 3'  
UG GUU UUUCUCU  
AC CGG AGAGGAGA  
miR-877 3' GGG G U UG 5'

mfe: -18.3 kcal/mol  
target 5' G GGAAGUUUUUU 3'  
ACAGU UUCUCU  
UGUCG AAGGAGA  
miR-3125 3' AGAGAGG U 5'

mfe: -15.9 kcal/mol  
target 5' A G G UUUUUU 3'  
GAC GUG AA UU CCUCU  
UUG UAC UU GA GGAGA  
miR-3125 3' A G G UGAU 5'

*let-7d*

### Derived allele (G) at rs712

mfe: -11.5 kcal/mol  
target 5' A UUU U 3'  
GUUUUU UCC  
CGGAGG AGG  
miR-378b 3' AAGA UUC UCA 5'

mfe: -10.9 kcal/mol  
target 5' U UC G 3'  
UUUUUUU CUC  
GAGAAGA GAG  
miR-378c 3' GGU CU GUUCAGGUCA 5'

mfe: -16.2 kcal/mol  
target 5' G GAA UUUU G 3'  
UG GUU UUUCUC  
AC CGG AGAGGAG  
miR-877 3' GGG G U AUG 5'

mfe: -17.9 kcal/mol  
target 5' G GGAAGUUUUUU G 3'  
ACAGU UUCUCU  
UGUCG AAGGAG  
miR-3125 3' AGAGAGG AU 5'

mfe: -15.7 kcal/mol  
target 5' A G G UUUUUU G 3'  
GAC GUG AA UU CCUC  
UUG UAC UU GA GGAG  
miR-3125 3' A G G UGAU A 5'

|                 | Ancestral allele (T) at rs9266                                                                                   | Derived allele (C) at rs9266                                                                                    |
|-----------------|------------------------------------------------------------------------------------------------------------------|-----------------------------------------------------------------------------------------------------------------|
| <b>miR-181a</b> | mfe: -16.7 kcal/mol<br>target 5' G CC A A 3'<br>UCAUC UG UGAAUGU<br>AGUGG GC ACUUACA<br>miRNA 3' UG CUGUC A A 5' | mfe: -16.5 kcal/mol<br>target 5' A C A 3'<br>UC CUGAC GAAUGU<br>AG GGCUG CUUACA<br>miRNA 3' UG U UCGCAA A 5'    |
| <b>miR-181b</b> | mfe: -19.3 kcal/mol<br>target 5' C A 3'<br>AUCC CUGA UGAAUGU<br>UGGG GGCU ACUUACA<br>miRNA 3' U GUCGUU A 5'      | mfe: -19.4 kcal/mol<br>target 5' C A 3'<br>AUCC CUGAC GAAUGU<br>UGGG GGCUG CUUACA<br>miRNA 3' U UCGUUA A 5'     |
| <b>miR-181c</b> | mfe: -16.8 kcal/mol<br>target 5' A C A 3'<br>UC CUGA UGAAUGU<br>AG GGCU ACUUACA<br>miRNA 3' UG U GUCCA A 5'      | mfe: -16.9 kcal/mol<br>target 5' A C A 3'<br>UC CUGAC GAAUGU<br>AG GGCUG CUUACA<br>miRNA 3' UG U UCCAA A 5'     |
| <b>miR-181d</b> | mfe: -19.3 kcal/mol<br>target 5' C A 3'<br>AUCC CUGA UGAAUGU<br>UGGG GGCU ACUUACA<br>miRNA 3' U GUUGUU A 5'      | mfe: -19.4 kcal/mol<br>target 5' C A 3'<br>AUCC CUGAC GAAUGU<br>UGGG GGCUG CUUACA<br>miRNA 3' U UUGUUA A 5'     |
| <b>miR-4264</b> | mfe: -11.7 kcal/mol<br>target 5' U CC U 3'<br>UG UCAU CUGA<br>AC GGUA GACU<br>miRNA 3' UU U CU CA 5'             | mfe: -12.7 kcal/mol<br>target 5' U UCAU C GAAU A 3'<br>UG CC UGAC GU<br>AC GG ACUG CA<br>miRNA 3' UU U U ACU 5' |

**Sup. Figure 2.** The effect of the derived alleles at rs712 and rs9266 on the *KRAS* mRNA/miRNA duplexes. Minimum free energies required to form a duplex between an individual miRNA and predicted high confidence miRNA complementary site with the derived or ancestral allele at rs712 and rs9266 (RNAhybrid).

**A.**

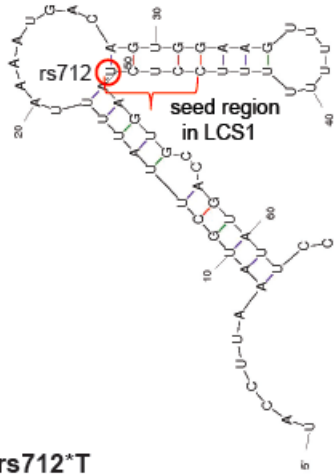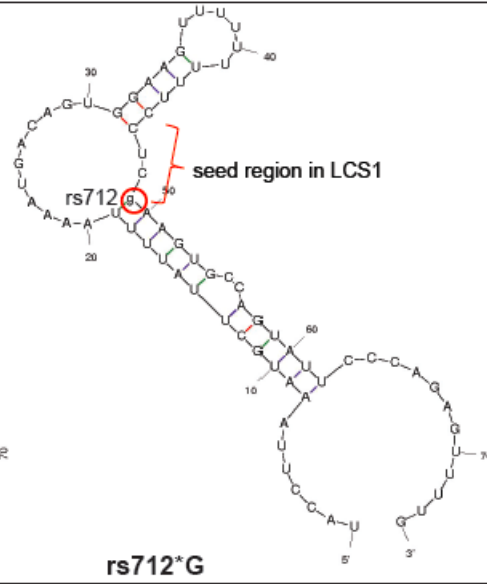

**B.**

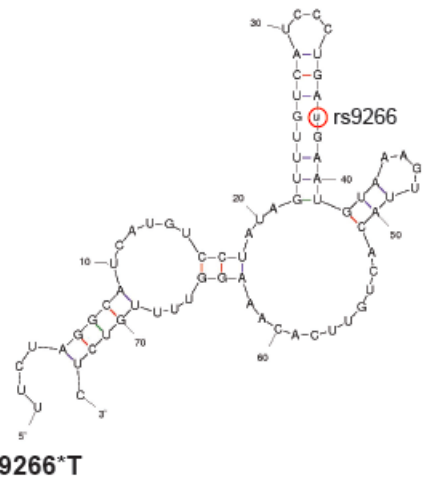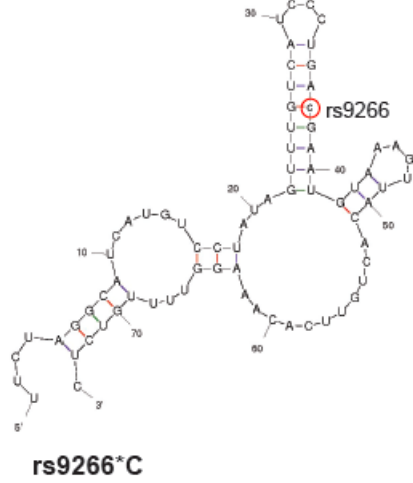

C.

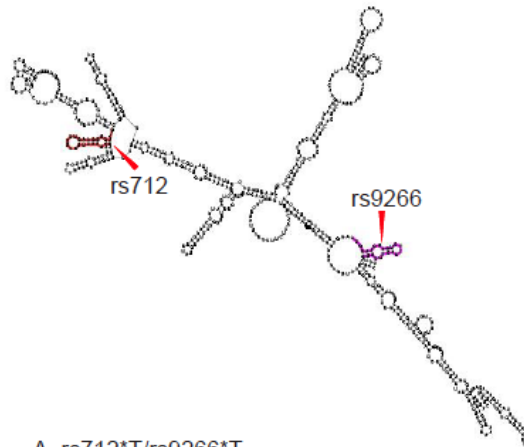

A. rs712\*T/rs9266\*T

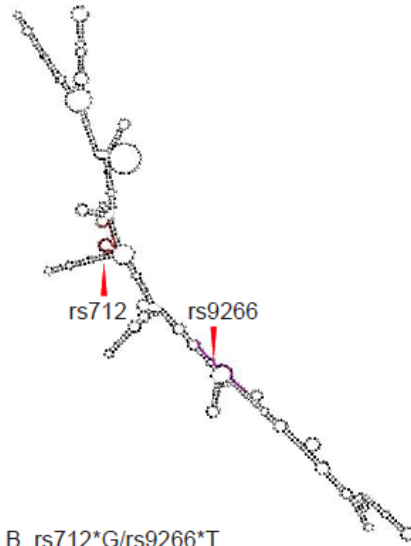

B. rs712\*G/rs9266\*T

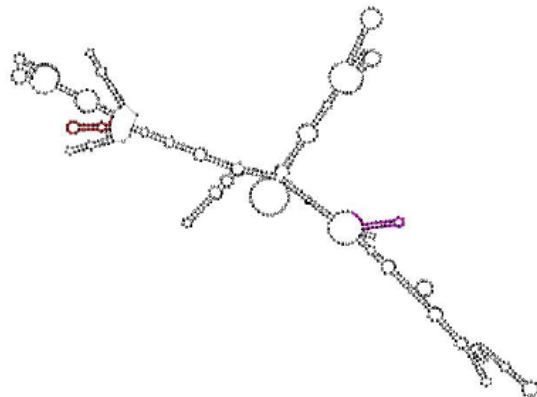

C. rs712\*T/rs9266\*C

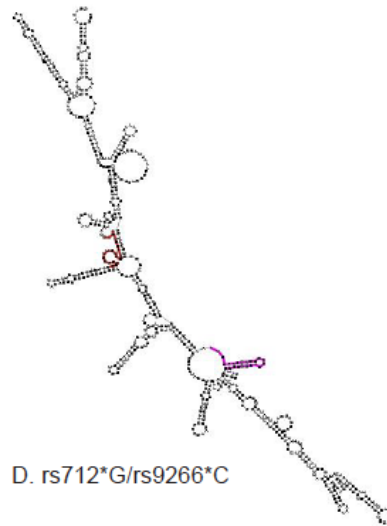

D. rs712\*G/rs9266\*C

**Sup. Figure 3.** The effect of the derived alleles at rs712 and rs9266 on the RNA secondary structures  
A. The effect of the derived allele at rs712 on the secondary structure of the selected region near LCS1 (Mfold)  
B. The effect of the derived allele at rs9266 on the secondary structure of the selected region (Mfold)  
C. The effects of the derived alleles at rs712 and rs9266 on the secondary structure of the exact length of a fragment in the reporter constructs. (The UEA sRNA toolkit) Red: LCS1 with rs712. Pink: miR-181 complementary site with rs9266. Arrow indicates the SNP site.

|                 | <b>Ancestral allele (C) at the novel 1 site</b>                                                                                                                                                     | <b>Derived allele (T) at the novel 1 site</b>                                                                                                                                                     |
|-----------------|-----------------------------------------------------------------------------------------------------------------------------------------------------------------------------------------------------|---------------------------------------------------------------------------------------------------------------------------------------------------------------------------------------------------|
| <b>miR-23a</b>  | mfe: -14.8 kcal/mol<br>target 5' U            UU CUU    A 3'<br>UCUUAUU U    ACC<br>AGGGUAG G    UGG<br>miRNA 3' UUU            GG UCCU    GG 5'                                                    | mfe: -13.0 kcal/mol<br>target 5' U            UU CUU    A 3'<br>UCUUAUU U    ACU<br>AGGGUAG G    UGG<br>miRNA 3' UUU            GG UCCU    GG 5'                                                  |
| <b>miR-181a</b> | mfe: -20.6 kcal/mol<br>target 5' U            A UG                    G 3'<br>CUUACC AU            UGAAUGUU<br>GAGUGG UG            ACUUACAA<br>miRNA 3' U            C UCGCA                    5' | mfe: -18.9 kcal/mol<br>target 5' U            A UG A                    G 3'<br>ACU AUUG A UGUUG GUGU<br>UGA UGGC U GCAAC UACA<br>miRNA 3'            G UG C            U A 5'                    |
| <b>miR-181b</b> | mfe: -21.2 kcal/mol<br>target 5' U            A U                    G 3'<br>CUUACC AU            GUGAAUGUU<br>GGGUGG UG            UACUUACAA<br>miRNA 3' U            C UCGU                    5' | mfe: -18.3 kcal/mol<br>target 5' U            U                    G 3'<br>CUUACU AU            GUGAAUGUU<br>GGGUGG UG            UACUUACAA<br>miRNA 3' U            C UCGU                    5' |
| <b>miR-181c</b> | mfe: -21.1 kcal/mol<br>target 5' U            A UG                    G 3'<br>CUUACC AU            UGAAUGUU<br>GAGUGG UG            ACUUACAA<br>miRNA 3' U            C UCCA                    5'  | mfe: -18.2 kcal/mol<br>target 5' U            UG                    G 3'<br>CUUACU AU            UGAAUGUU<br>GAGUGG UG            ACUUACAA<br>miRNA 3' U            C UCCA                    5'  |
| <b>miR-181d</b> | mfe: -21.2 kcal/mol<br>target 5' U            A U                    G 3'<br>CUUACC AU            GUGAAUGUU<br>GGGUGG UG            UACUUACAA<br>miRNA 3' U            C UUGU                    5' | mfe: -18.5 kcal/mol<br>target 5' U            U                    G 3'<br>CUUACU AU GUGAAUGUU<br>GGGUGG UG UACUUACAA<br>miRNA 3' U            CUGU U                    5'                       |

**Sup. Figure 4.** The effect of the novel variant (novel 1) on the *KRAS* mRNA/miRNA duplexes  
 Minimum free energies required to form a duplex between an individual miRNA and predicted high confidence miRNA complementary site with the derived or ancestral allele at the novel varying site (RNAhybrid).

|        |                                          |
|--------|------------------------------------------|
| SMJ104 | CTAGCTAGCATACAATTTGTACTTTTTTCTTAAGGCATAC |
| LJC1   | GGCACACCACCACCCCAAATCTC                  |
| LJC2   | CCATCTTCAGTGCCAGTCTTGGG                  |
| LJC3   | GGGTCGTATACCAAAGGCCTTAG                  |
| LJC4   | GCCTGAACTAGTTCACAGACAAGGG                |
| LJC5   | CTAGCTAGCTCAATGCAGAATTCATGCTATCCAG       |
| MK5    | TGCTTTTGTTTCTTAAGAAAACAACTC              |
| MK6    | GAAGAGTCCTAAAACGAGAATGGATATTC            |
| MK7    | TACCAGATGCCAGTCACCGCAC                   |
| MK8    | CTGAAGTATGGCCATTTCTTTCTCTG               |
| MK10   | GTGTAGTAATGTTTTTTAGAACCCAGCAG            |
| MK11   | TTCCTAGGTCAGCGCAACCAAATG                 |
| MK12   | GTGTAAACTGAAACATGCACATTTTGTAC            |
| MK13   | GGTTCACTACAAAACAAACAGTTCCTG              |

**Sup. Table 8.** Primers used to amplify and sequence the *KRAS* 3' UTR in NSCLC cases
